# Supplementary material
Source: PubMed Central journal article supplement (PMC7047124)

## Supplementary Data

---

**SUPPLEMENTARY FIG. S1.** Comparison of muscle architecture characteristics in the TEMR responder and TEMR max responder animals. **(A)** Schematic representation of the regions where measurements were obtained (*yellow boxes*) in TEMR responders and TEMR max responders. *Red shading* on the TEMR responder indicates the defect area, where *de novo* muscle regeneration nominally occurred. **(B)** Median FCSA measurements were calculated from ~200 fibers in the cortex of the TA from each animal (TEMR responder  $n=5$ , TEMR max responder  $n=3$ ). Medians were significantly different ( $*p < 0.05$ , Mann–Whitney test) from each other. Values are the median with minimum to maximum range due to the nonparametric distribution of the data. **(C)** Median FCSA measurements were calculated from ~200 fibers in the core of the TA from each animal (TEMR responder  $n=5$ , TEMR max responder  $n=3$ ). Medians were significantly different ( $*p < 0.05$ ; Mann–Whitney test) from each other. Values are the median with minimum to maximum range. **(D)** The TEMR max responder cortex FCSA frequency distribution curve displays a similar range of FCSA values as that of the TEMR responder muscles and there were no significant differences at any bin size (multiple  $t$ -tests correcting for false discovery rate,  $p > 0.05$  at all points). **(E)** The TEMR max responder core FCSA frequency distribution curve displays a similar range of FCSA values as that of the TEMR responder muscles, and there were no significant differences in any bin size (multiple  $t$ -tests correcting for false discovery rate,  $p > 0.05$  at all points). Please note that when grouped into bins, FCSA had a normal distribution, and therefore, parametric statistical analyses were used, whereas analysis of the entire population of FCSA values revealed a non-normal distribution and required nonparametric statistical analyses. **(F)** In the cortex, two-way ANOVA revealed no effect of treatment ( $p > 0.9$ ), and no treatment–fiber-type interaction ( $p > 0.5$ ), but a significant effect of fiber type ( $p < 0.05$ ). **(G)** In the core, two-way ANOVA revealed no effect of treatment ( $p > 0.9$ ), and no interaction ( $p > 0.06$ ), but in contrast, no effect of fiber type either ( $p = 0.2$ ) capillaries **(H)** and vessels **(I)** were quantified. There were no significant differences between the TEMR responders and TEMR max responders for both analyses (Mann–Whitney test,  $p > 0.9$ ). **(J)** TEMR max responders had levels of innervation comparable to the TEMR responders (unpaired  $t$ -test,  $p = 0.7$ ). **(K)** CD68<sup>+</sup>/CD163<sup>−</sup> macrophage numbers were not significantly different between TEMR responders and TEMR max responders (Mann–Whitney test,  $p = 0.1$ ). **(L)** CD68<sup>+</sup>/CD163<sup>+</sup> macrophage numbers were not significantly different between TEMR responders and TEMR max responders (Mann–Whitney test,  $p = 0.6$ ). Values are expressed as the median  $\pm$  range except in **(F, G, and J)**, where they are expressed as the mean  $\pm$  standard error of the mean. Sample sizes are noted in parentheses. ns, not significant; ANOVA, analysis of variance; TEMR, tissue-engineered muscle repair; TA, tibialis anterior; FCSA, fiber cross-sectional area.

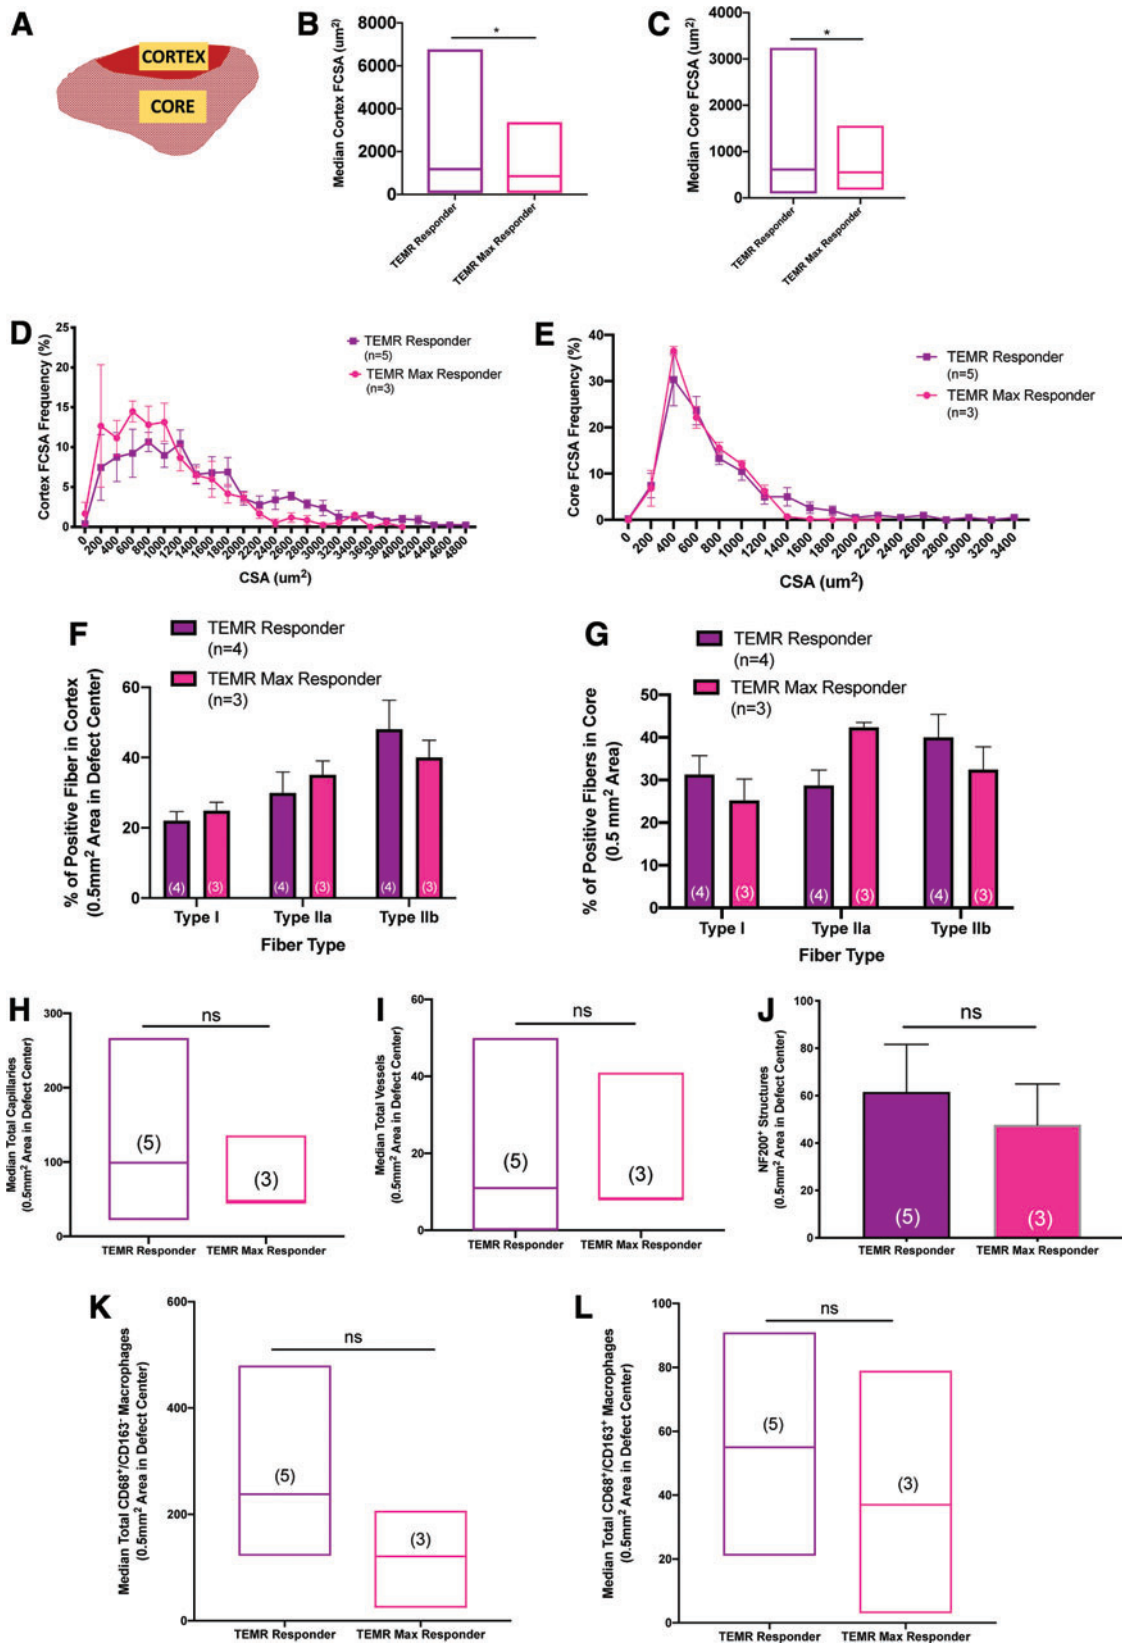

Supplement: Supp_Fig1.pdf [file Supp_Fig1.pdf]
