# Supplementary material
Source: PubMed Central journal article supplement (PMC7047124)
Supplement: Supp_Fig2.pdf [file Supp_Fig2.pdf]

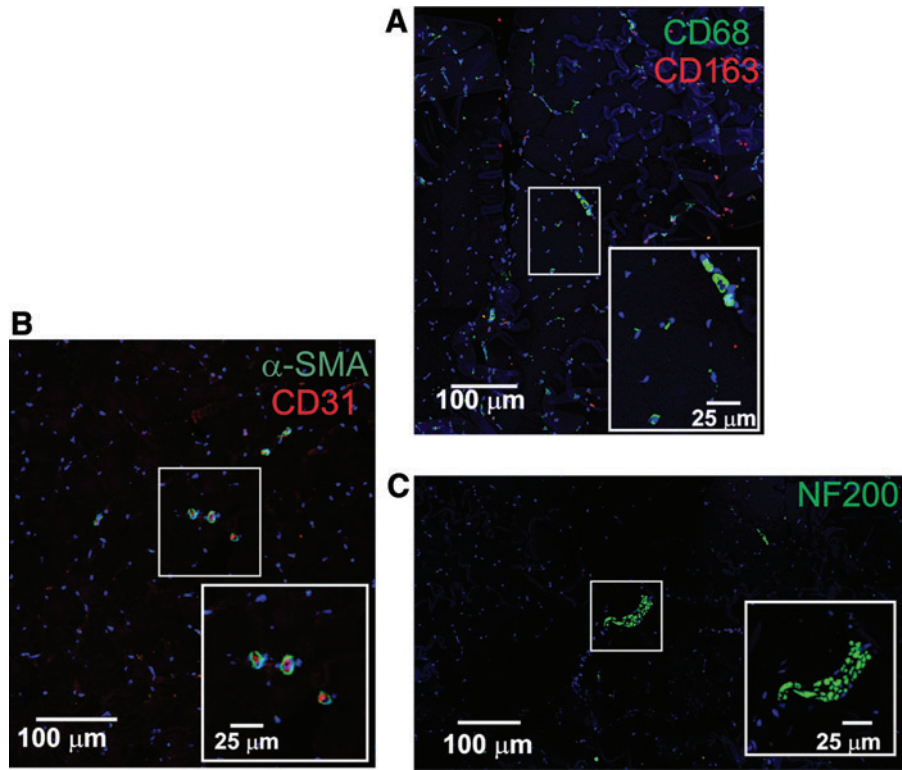

**SUPPLEMENTARY FIG. S2.** Representative immunofluorescence staining the contralateral controls of TEMR max responders. **(A)** Representative macrophage staining in the cortex of a control muscle. Samples were stained for CD68<sup>+</sup> (*inset*) and CD163<sup>+</sup> macrophages. The *white box* is shown at a higher magnification in the *inset*. **(B)** Contralateral control sections were stained for  $\alpha$ -SMA (smooth muscle cells) and CD31 (endothelial cells). Representative staining is shown in a higher magnification inset that corresponds to the *outlined area*. **(C)** Representative neuron staining in the contralateral control muscle of TEMR max responder. *Punctate dots* were counted as occurrences of positive staining. The *inset* shows a higher magnification of NF200 staining. SMA, smooth muscle actin.
